# Supplementary material for: Targeted next‐generation sequencing of deaf patients from Southwestern China
Source: PubMed Central journal article supplement — Mol Genet Genomic Med. 2021 Mar 16;9(4):e1660. doi: 10.1002/mgg3.1660 (PMC8123756; doi:10.1002/mgg3.1660), 2021-03-16
Supplement: MGG3-9-e1660-s001.pdf [file MGG3-9-e1660-s001.pdf]

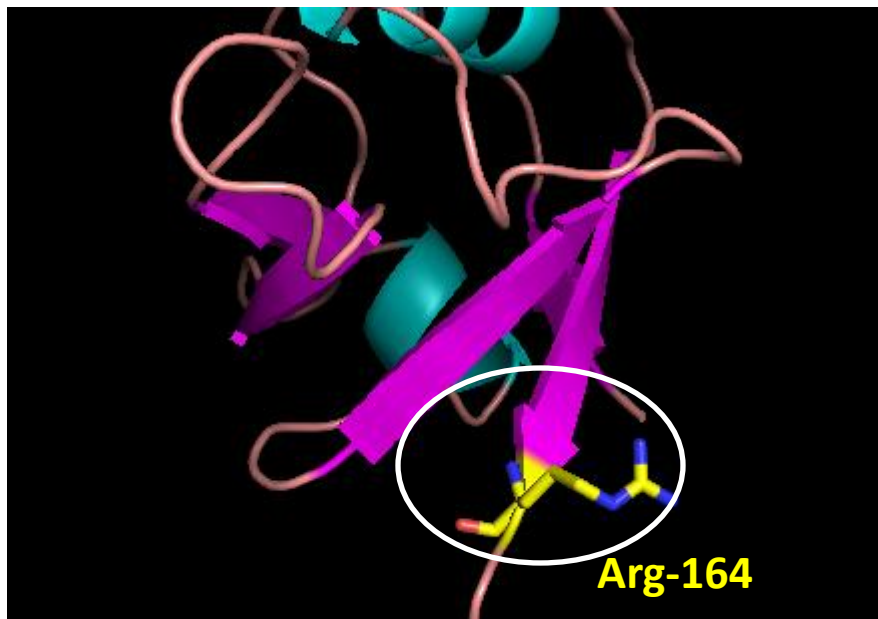

PDZD7 p.Arg164

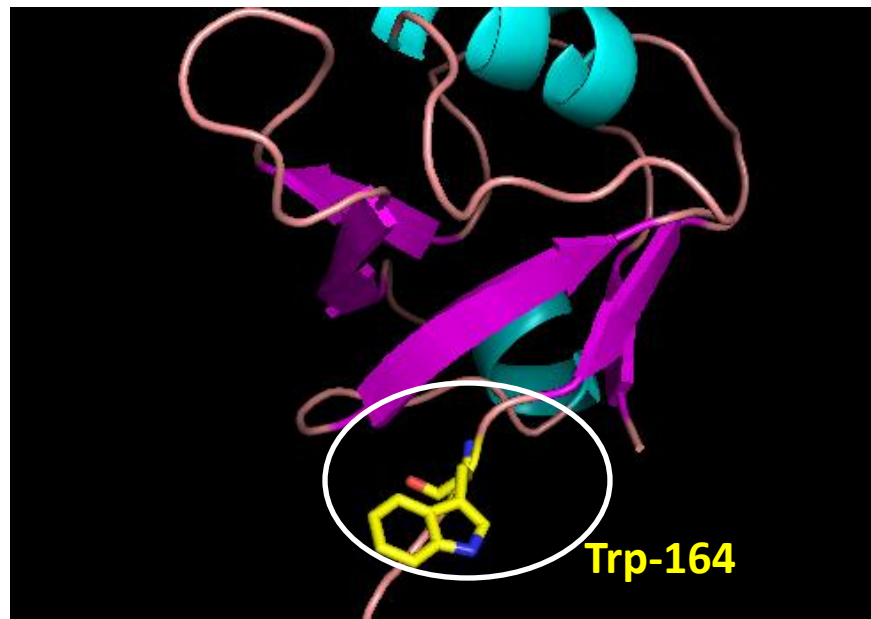

PDZD7 p.Arg164Trp

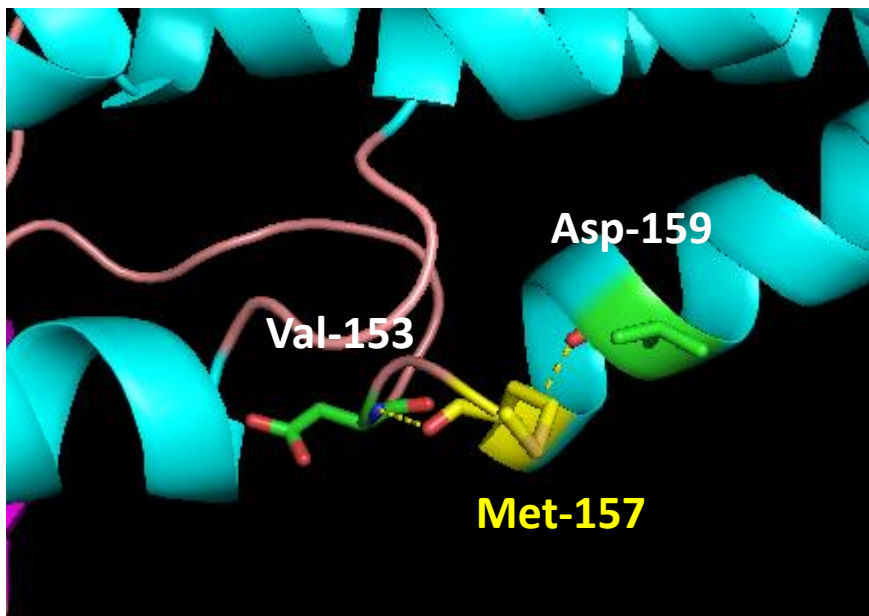

GJB2 p.Met157

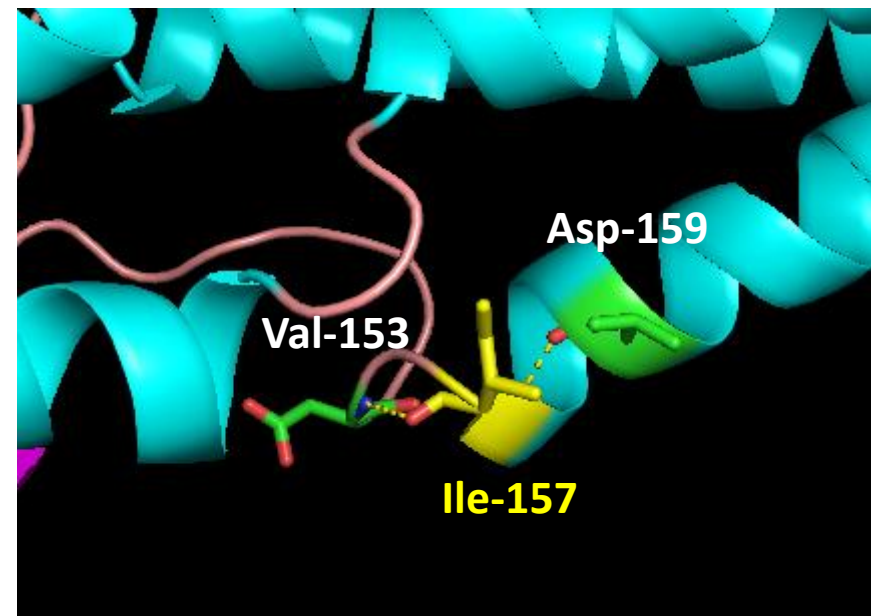

GJB2 p.Met157Ile

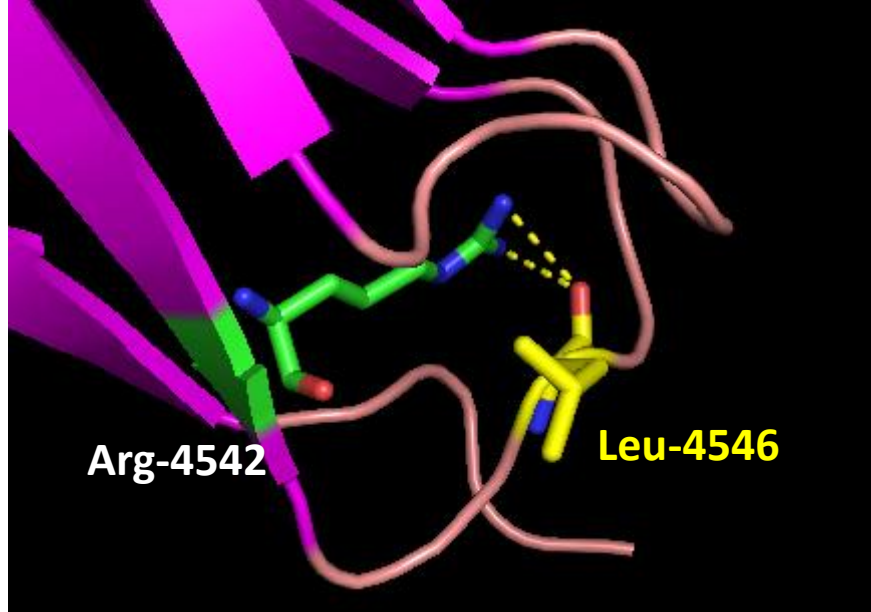

ADGRV1 p.Leu4546

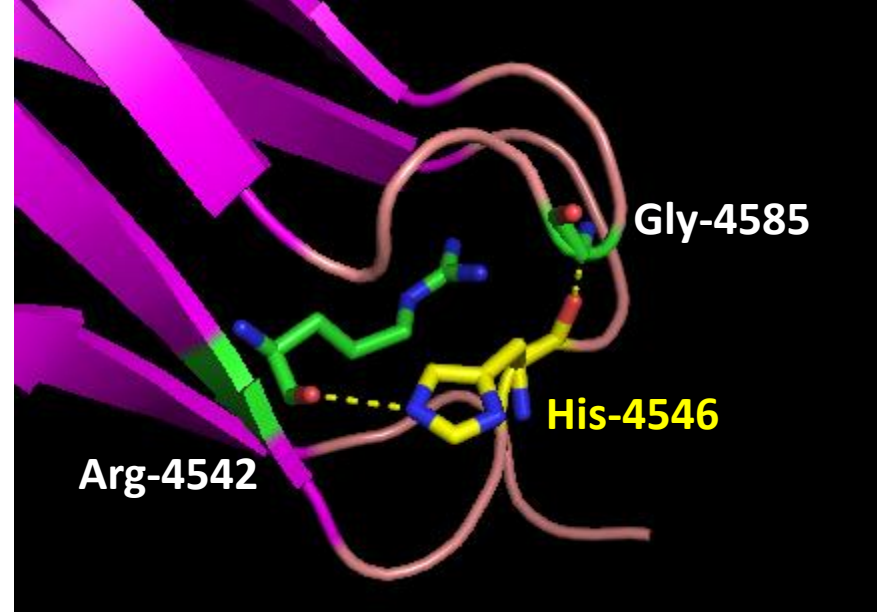

ADGRV1 p.Leu4546His

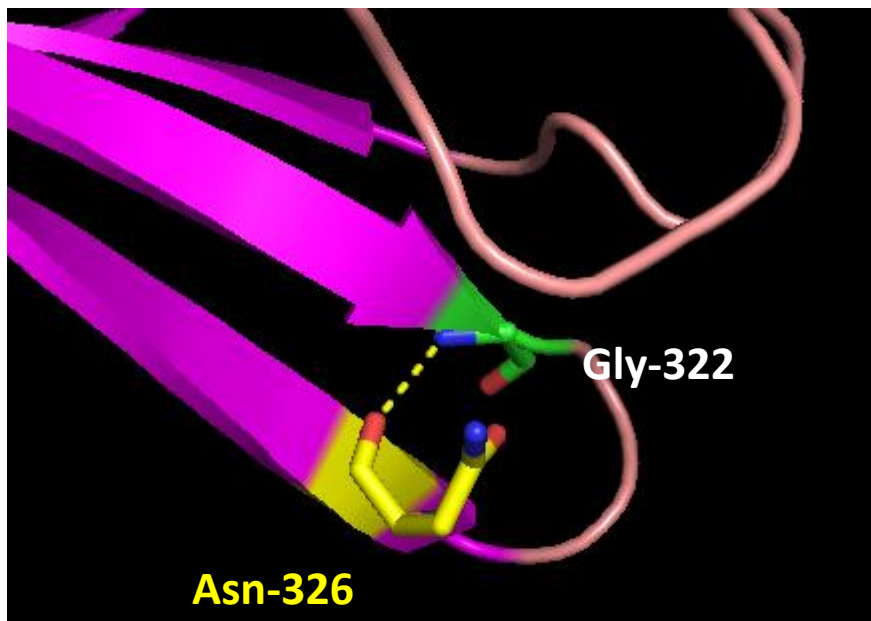

LOXHD1 p.Asn326

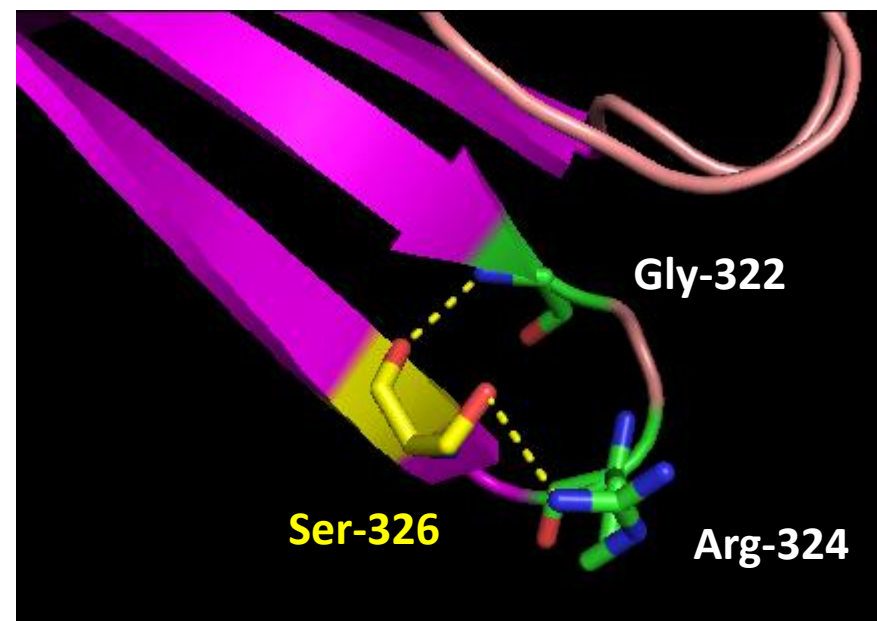

LOXHD1 p.Asn326Ser

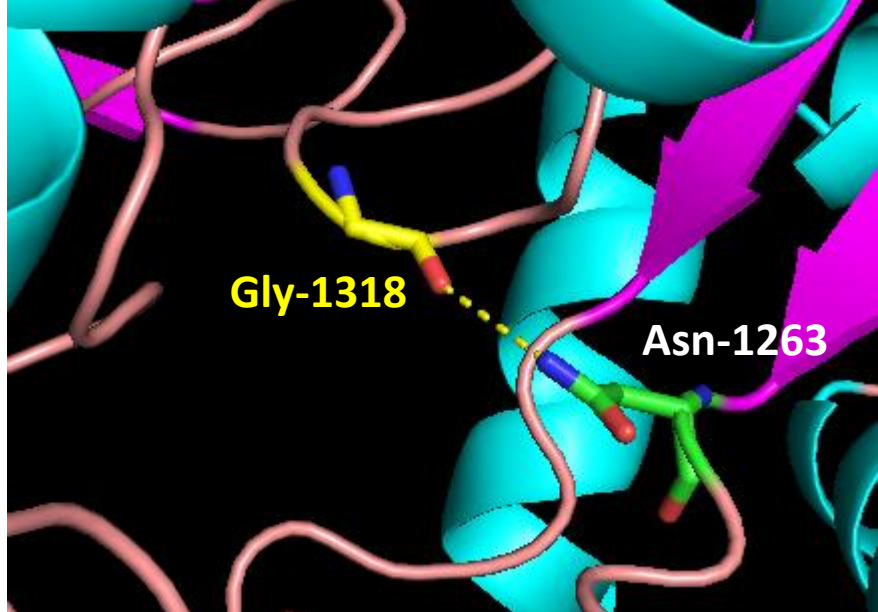

MYO15A p.Gly1318

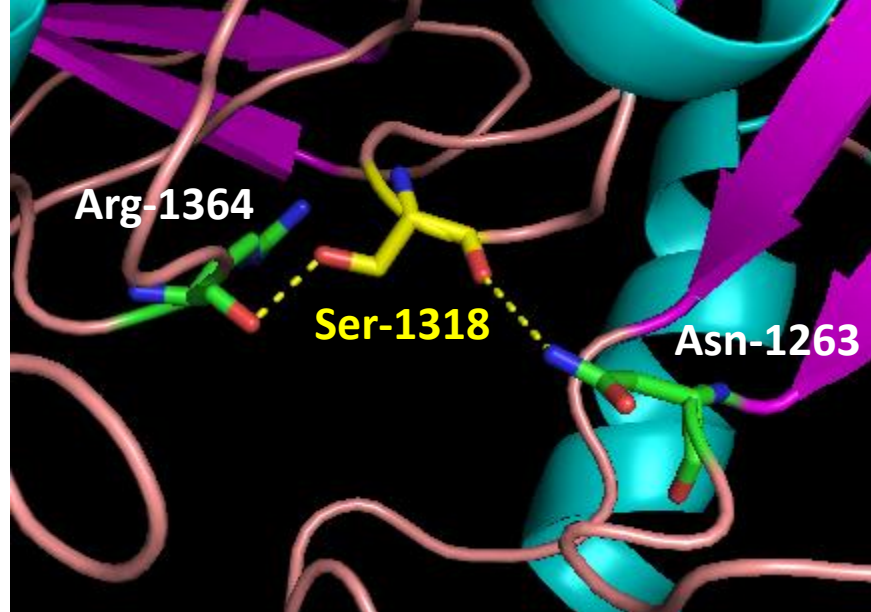

MYO15A p.Gly1318Ser

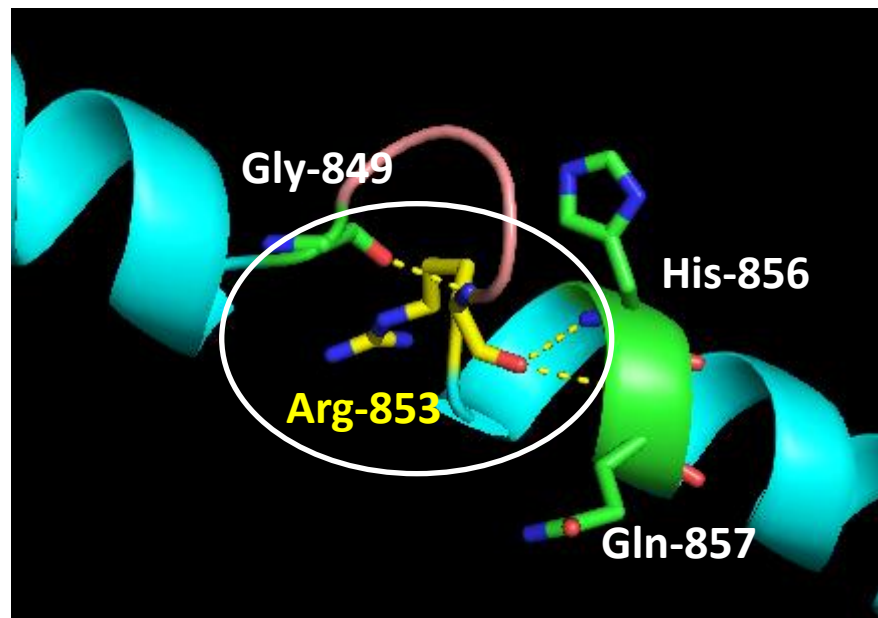

MYO7A p.Arg853

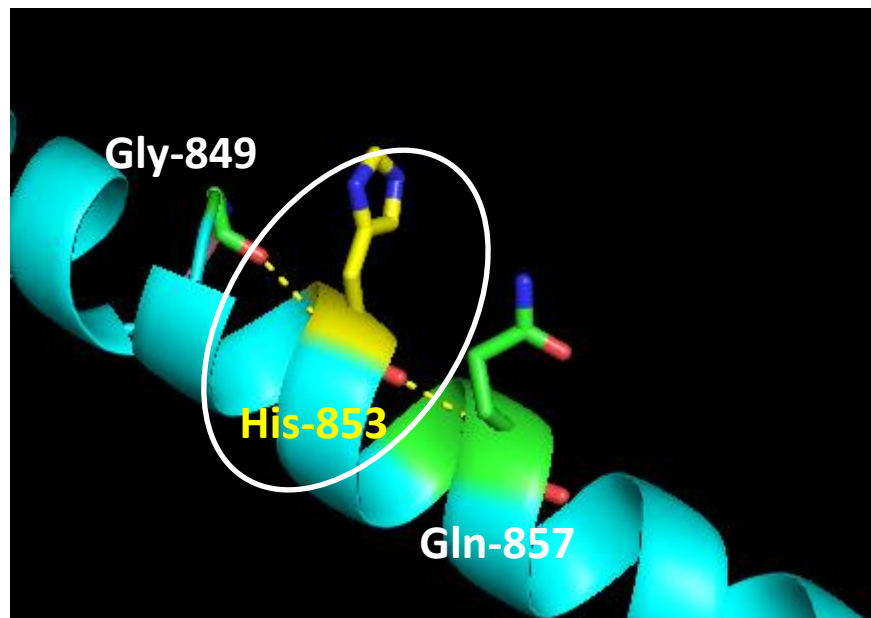

MYO7A p.Arg853His



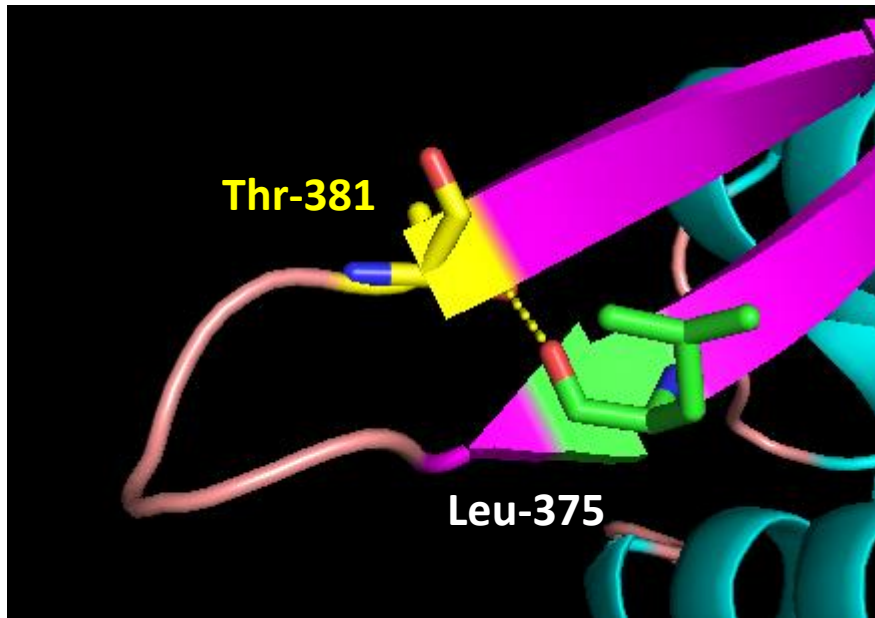

**MYO7A p.Thr381Met**

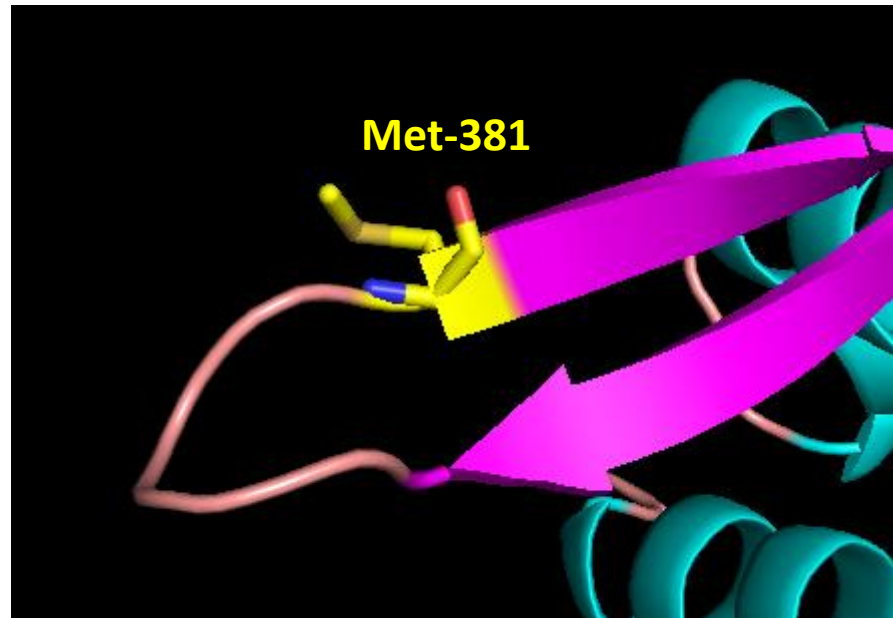

**MYO7A p.Thr381Met**

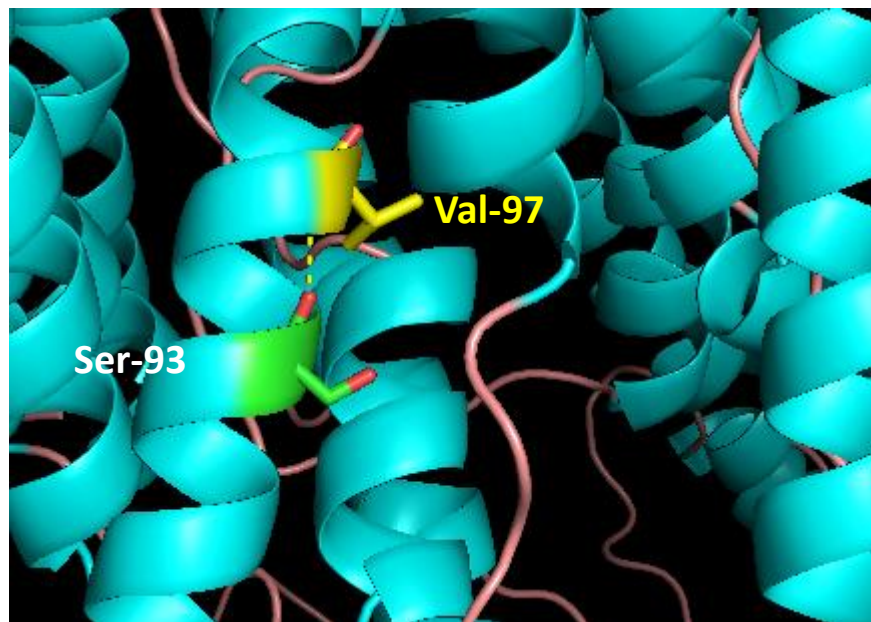

**SLC26A4 p.Val97**

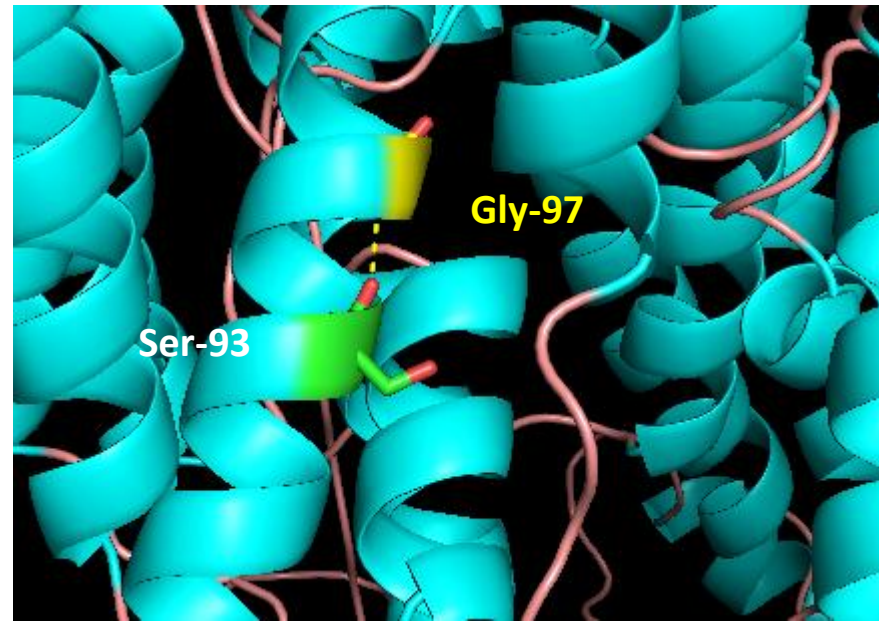

**SLC26A4 p.Val97Gly**

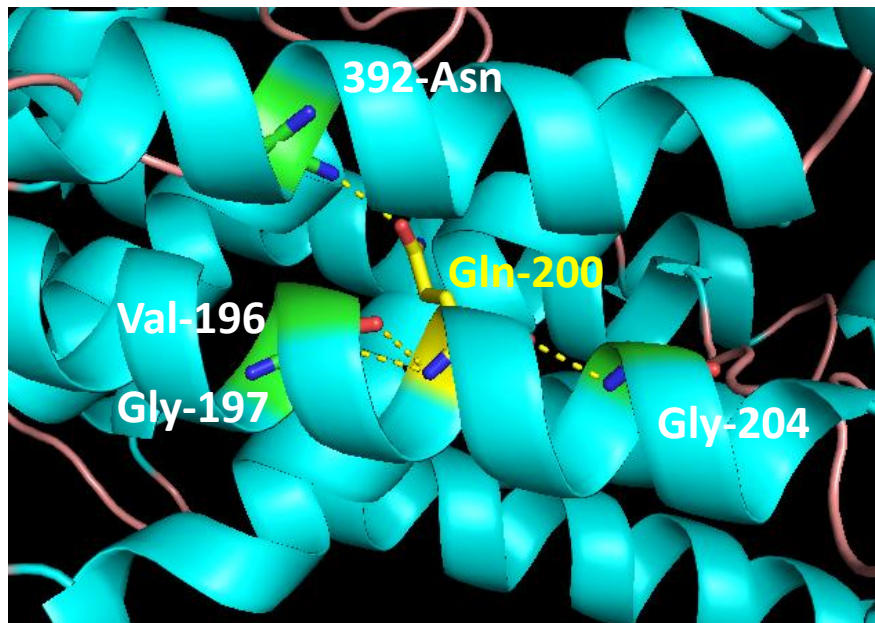

SLC26A4 p.Gln200

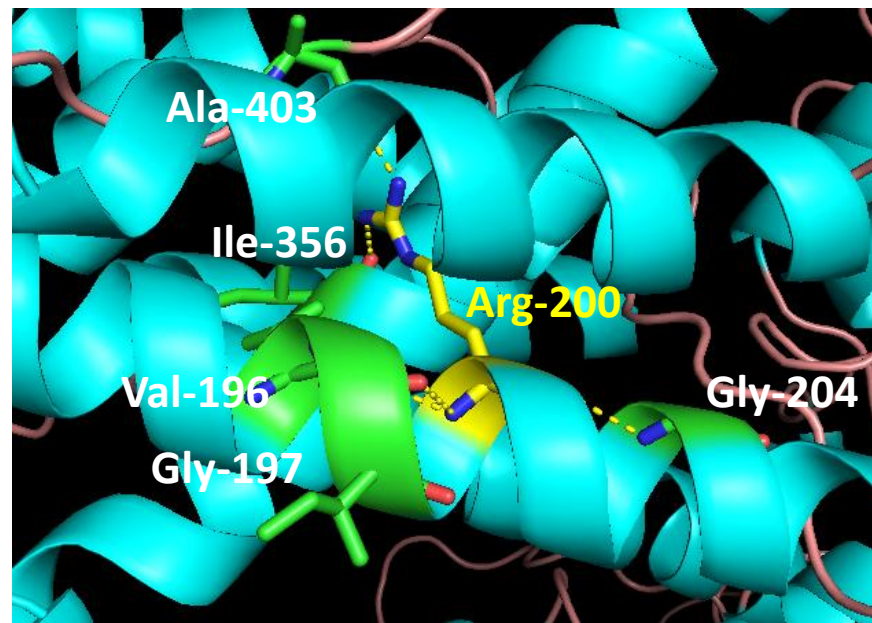

SLC26A4 p.Gln200Arg

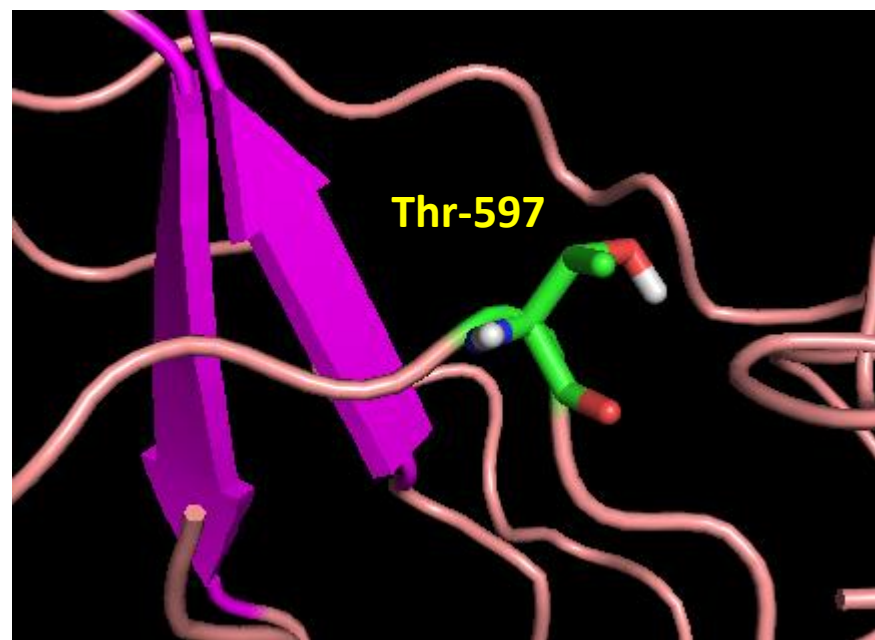

OTOF p. Thr597

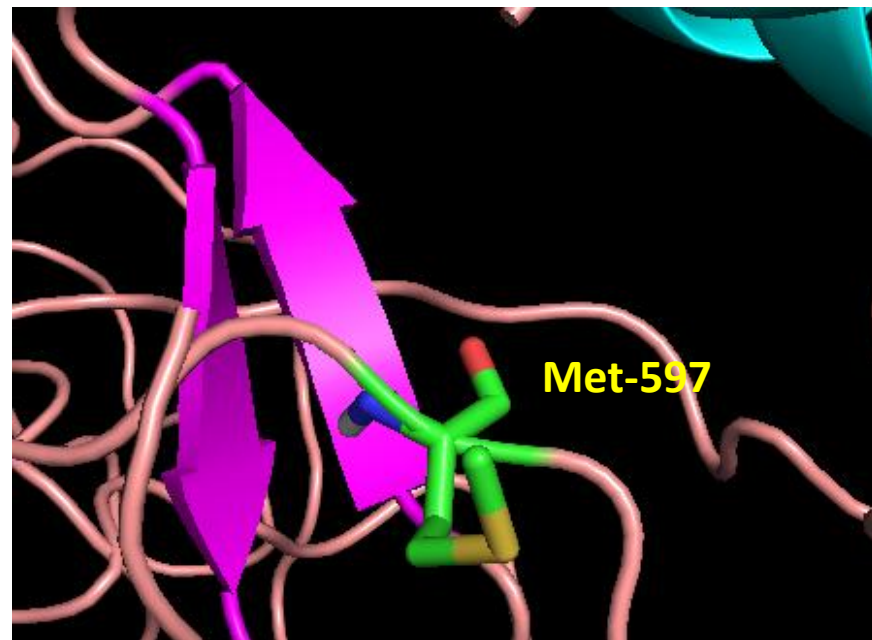

OTOF p. Thr597Met



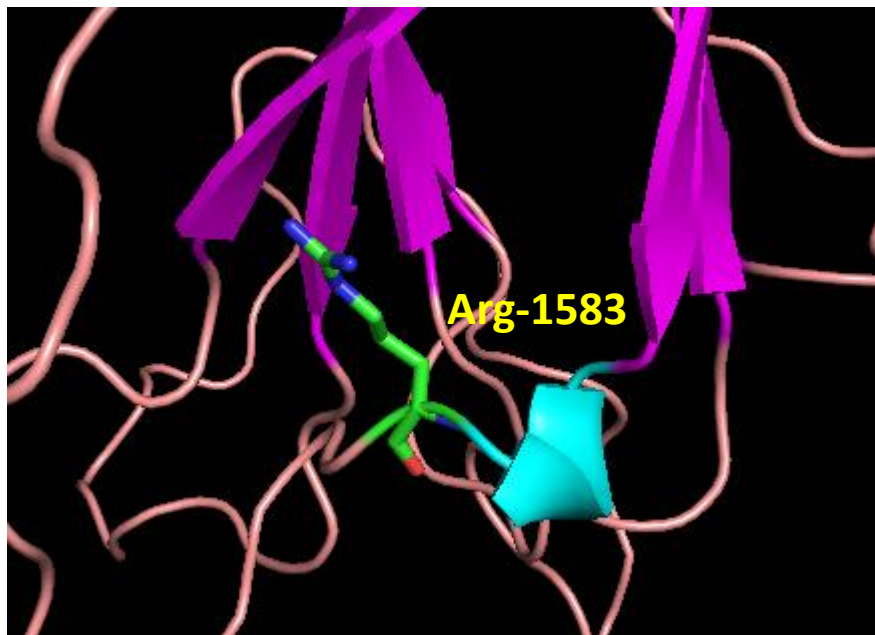

OTOF p. Arg1583

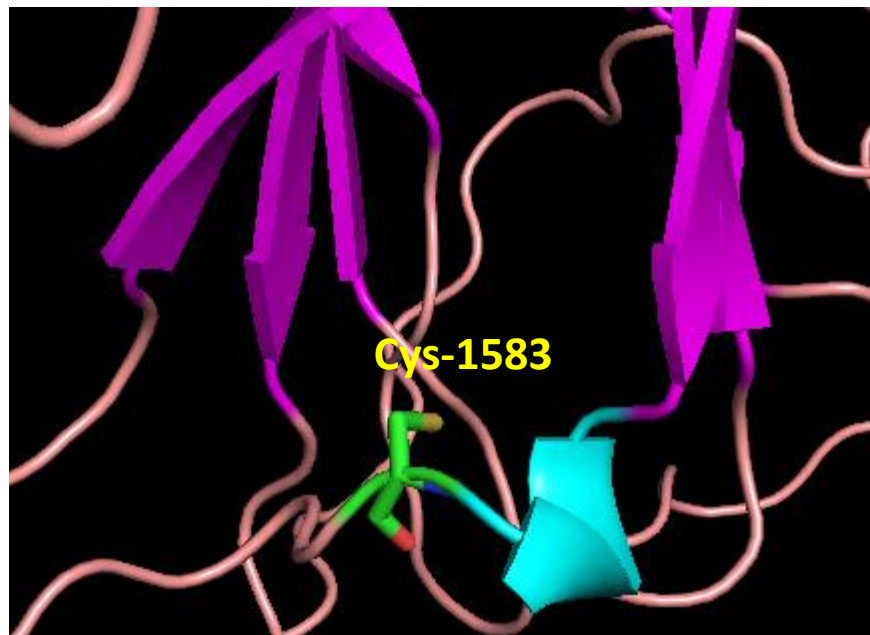

OTOF p. Arg1583Cys

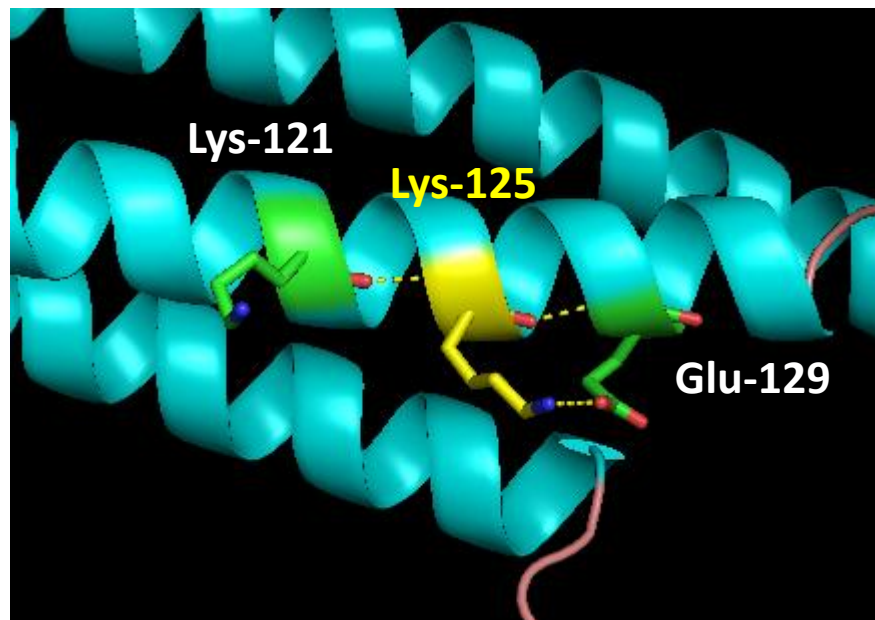

TMC1 p.Lys125

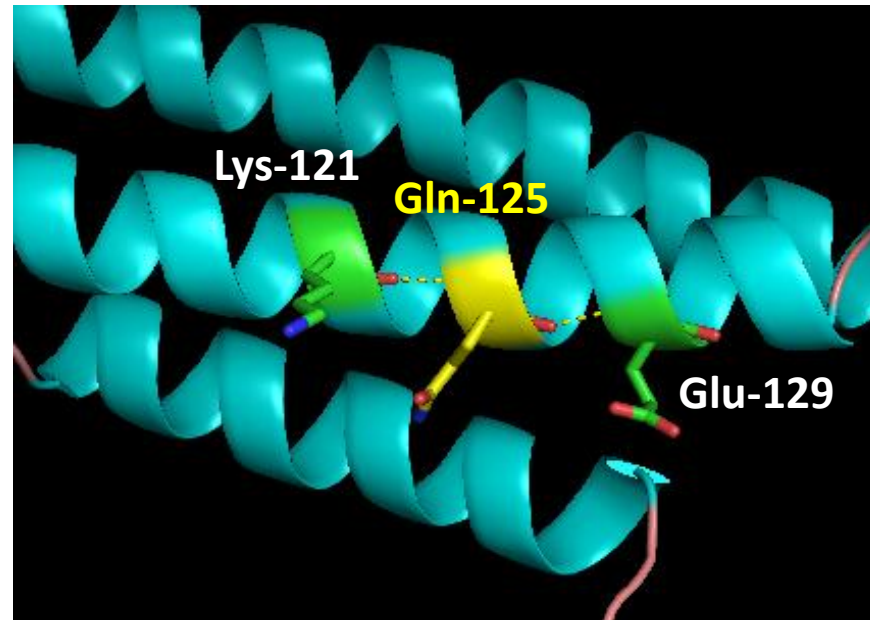

TMC1 p.Lys125Gln

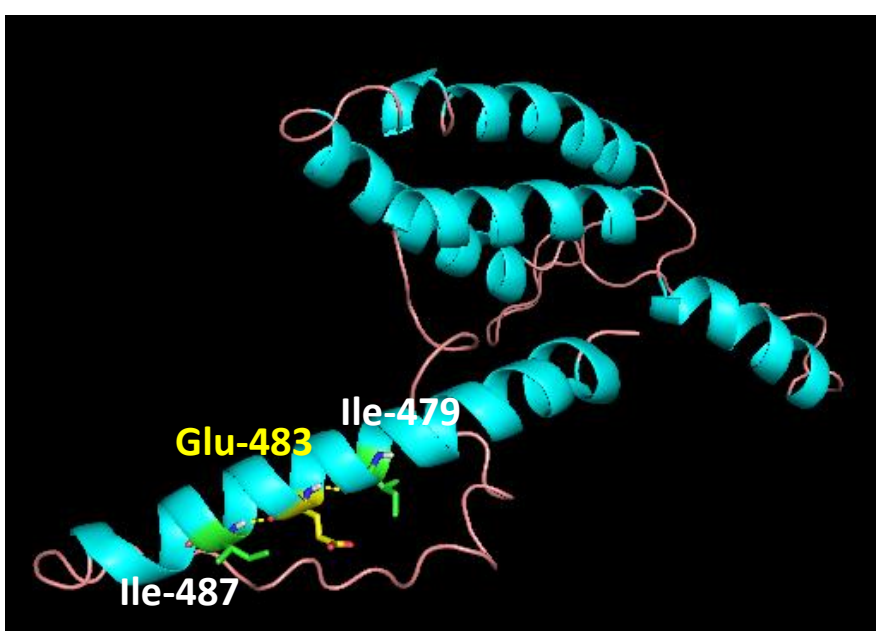

**TMC1 p.Glu483**

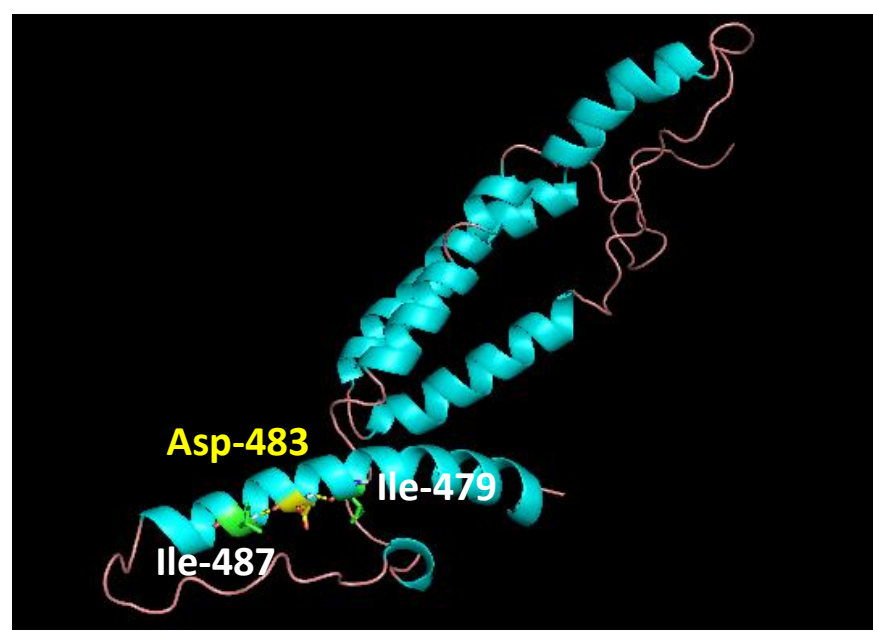

**TMC1 p.Glu483Asp**

**3D model unpredicted**

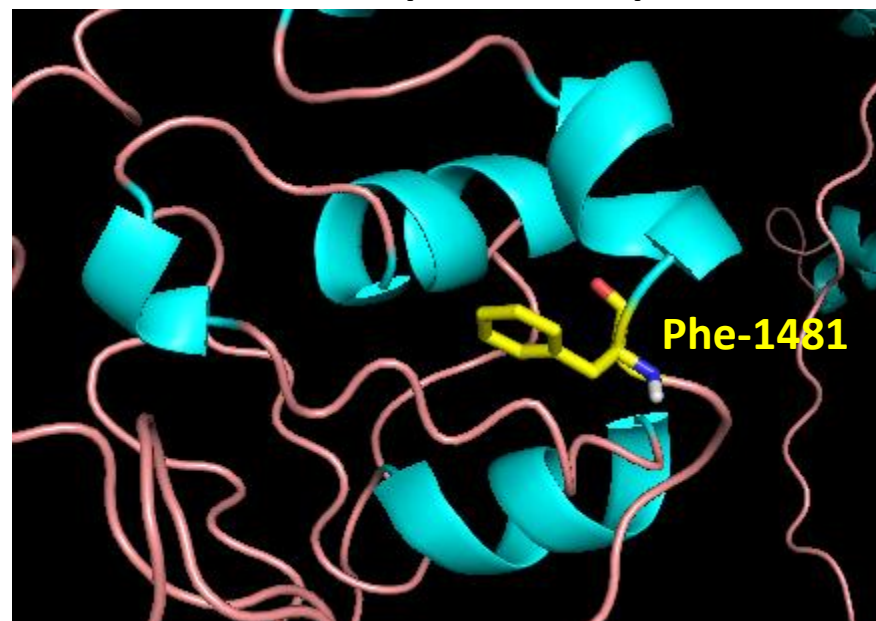

**TRIOBP p.Ser1481**

**TRIOBP p.Ser1481Phe**
